# Supplementary material
Source: Elsevier journal article supplement (https://www.sciencedirect.com/science/article/pii/S2387020622001012)
Supplement: mmc1 [file S2387020622001012:mmc1.doc]

**Supplementary Table S1. Incidence of laboratory-confirmed COVID-19 cases according to baseline demographical and clinical characteristics (comorbidities/medications) in community-dwelling individuals (N=77,669). Tarragona region (Southern Catalonia, Spain), from 01/03/2020 to 30/06/2020.**

| **CHARACTERISTIC** | **Study population**  **(N=77669)**  **n (%)** | **LABORATORY-CONFIRMED COVID-19 CASES (n=345)** | | |
| --- | --- | --- | --- | --- |
| **Univariate analysis**  **n (%) p-value** | **Time follow-up**  **(persons-week)** | **Incidence rate**  **(95% CI)** |
| **Socio-demographic** | | | | |
| **Age:** 50-64 years  65-79 years  ≥80 years | 42533 (54.8)  25712 (33.1)  9424 (12.1) | 175 (50.7) 0.004  108 (31.3)  62 (18.0) | 731553  442706  160810 | 23.9 (20.6-27.7)  24.4 (20.0-29.8)  38.6 (29.7-50.2) |
| **Sex** Men  Women | 37143 (47.8)  40526 (52.2) | 172 (49.9) 0.449  173 (50.1) | 638226  696843 | 26.9 (23.2-31.2)  24.8 (21.4-28.8) |
| **Comorbidities** | | | | |
| **Neurological disease** | 1950 (2.5) | 14 (4.1) 0.066 | 33074 | 42.3 (23.1-71.1) |
| **Renal disease** | 4240 (5.5) | 40 (11.6) <0.001 | 72114 | 55.5 (39.6-75.5) |
| **Cancer** | 6461 (8.3) | 46 (13.3) 0.001 | 109968 | 41.8 (30.5-56.0) |
| **Rheumatic disease** | 860 (1.1) | 6 (1.7) 0.261 | 14699 | 40.8 (15.0-88.9) |
| **Inflammatory bowel disease** | 520 (0.7) | 3 (0.9) 0.648 | 8927 | 33.6 (6.9-98.1) |
| **Respiratory disease** | 7074 (9.1) | 61 (17.7) <0.001 | 120762 | 50.5 (38.9-65.7) |
| **Cardiac disease** | 12923 (16.6) | 90 (26.1) <0.001 | 221049 | 40.7 (32.9-50.5) |
| **Atrial fibrillation** | 3560 (4.6) | 37 (10.7) <0.001 | 60657 | 61.0 (42.5-84.8) |
| **Liver disease** | 1438 (1.9) | 8 (2.3) 0.519 | 24570 | 32.6 (14.1-64.2) |
| **Diabetes** | 12925 (16.6) | 68 (19.7) 0.125 | 221837 | 30.7 (24.1-39.0) |
| **Hypertension** | 33992 (43.8) | 159 (46.1) 0.384 | 583619 | 27.2 (23.2-31.9) |
| **Hypercholesterolemia** | 26765 (34.5) | 114 (33.0) 0.579 | 460087 | 24.8 (20.7-29.8) |
| **Obesity** | 21343 (27.5) | 91 (26.4) 0.646 | 366948 | 24.8 (20.1-30.8) |
| **Smoking** | 12640 (16.3) | 32 (9.3) <0.001 | 217755 | 14.7 (9.9-21.0) |
| **Alcoholism** | 1756 (2.3) | 8 (2.3) 0.942 | 30125 | 26.6 (11.5-52.4) |
| **Chronic medication use** | | | | |
| **Diuretics** | 8028 (10.3) | 70 (20.3) <0.001 | 136857 | 51.1 (40.1-64.9) |
| **Beta blockers** | 9311 (12.0) | 58 (16.8) 0.006 | 159529 | 36.4 (28.0-47.3) |
| **ACEIs** | 16030 (20.6) | 56 (16.2) 0.043 | 275658 | 20.3 (15.6-26.4) |
| **ARBs** | 8709 (11.2) | 42 (12.2) 0.571 | 149802 | 28.0 (20.0-38.1) |
| **Calcium channel blockers** | 6315 (8.1) | 35 (10.1) 0.170 | 108465 | 32.3 (22.5-44.9) |
| **Statins** | 15910 (20.5) | 66 (19.1) 0.532 | 273714 | 24.1 (18.9-30.6) |
| **Oral anticoagulants** | 3741 (4.8) | 37 (10.7) <0.001 | 63865 | 57.9(40.4-80.5) |
| **Antiplatelet drugs** | 8809 (11.3) | 55 (15.9) 0.007 | 150896 | 36.4(28.0-47.3) |
| **Insulin** | 2904 (3.7) | 24 (7.0) 0.002 | 49699 | 48.3 (31.0-72.0) |
| **Oral antidiabetic drugs** | 10352 (13.3) | 45 (13.0) 0.876 | 178039 | 25.3 (18.4-33.9) |
| **Inhaled respiratory drugs** | 6095 (7.8) | 57 (16.5) <0.001 | 103830 | 54.9 (42.3-71.4) |
| **Antineoplastic agents** | 1581 (2.0) | 6 (1.7) 0.696 | 27209 | 22.1 (8.1-48.2) |
| **Systemic corticosteroids** | 1216 (1.6) | 10 (2.9) 0.046 | 20457 | 48.9 (23.5-90.0) |
| **NSAIDs** | 4305 (5.5) | 21 (6.1) 0.658 | 73888 | 28.4 (17.6-43.5) |
| **Antihistamines** | 3221 (4.1) | 13 (3.8) 0.723 | 55545 | 23.4 (12.4-40.0) |
| **Proton-Pump Inhibitors** | 17315 (22.3) | 108 (31.3) <0.001 | 296238 | 36.5 (29.9-44.5) |
| **Benzodiazepines** | 12654 (16.3) | 74 (21.4) 0.009 | 216635 | 34.2 (26.8-43.4) |
| **Vaccination’s history** | | | | |
| **Flu vaccine in prior autumn** | 21569 (27.8) | 103 (29.9) 0.386 | 370309 | 27.8 (22.7-33.9) |
| **PPV23** | 25222 (32.5) | 142 (41.2) 0.001 | 432783 | 32.8 (27.7-38.8) |
| **PCV13** | 1115 (1.4) | 13 (3.8) <0.001 | 18935 | 68.7 (36.5-117.5) |
| **Tetanus** | 49817 (64.1) | 231 (67.0) 0.274 | 856072 | 27.0 (23.8-30.6) |

NOTE: P-values in univariate analysis were calculated by chi-squared, or Fisher’s test as appropriate, comparing percentages in the study population *vs* COVID-19 cases; IR denotes incidence rates per 100.000 persons-week; CIs denotes confidence intervals for incidence rates and were calculated assuming a Poisson distribution for uncommon events.

**Supplementary Table S2. Cox regression analyses assessing unadjusted, age & sex adjusted and multivariable-adjusted risks to suffer laboratory-confirmed COVID-19 in community-dwelling individuals (N=77,669). Tarragona region (Southern Catalonia, Spain) from 01/03/2020 to 30/06/2020.**

| **CHARACTERISTIC** | **LABORATORY-CONFIRMED COVID-19 CASES (n=345)** | | |
| --- | --- | --- | --- |
| **Unadjusted**  **HR (95% CI)** | **Age & sex adjusted**  **HR (95% CI)** | **Multivariable-adjusted**  **HR (95% CI)** |
| **Socio-demographic** | | | |
| **Age (continuous years)** | 1.02 (1.01-1.02) | 1.02 (1.01-1.03) | 0.99 (0.98-1.01) |
| **Sex:** women | 0.92 (0.75-1.14) | 0.89 (0.72-1.11) | 0.90 (0.72-1.13) |
| **Comorbidities** | | | |
| **Neurological disease** | 1.66 (0.97-2.83) | 1.38 (0.80-2.39) | 1.06 (0.60-1.86) |
| **Renal disease** | 2.29 (1.65-3.18) | 2.00 (1.40-2.86) | 1.50 (1.02-2.21) |
| **Cancer** | 1.71 (1.25-2.33) | 1.57 (1.14-2.15) | 1.45 (1.05-2.01) |
| **Rheumatic disease** | 1.59 (0.71-3.56) | 1.57 (0.70-3.52) | 1.50 (0.63-3.58) |
| **Respiratory disease** | 2.16 (1.64-2.84) | 2.03 (1.53-2.68) | 1.39 (0.89-2.18) |
| **Cardiac disease** | 1.78 (1.40-2.26) | 1.62 (1.26-2.10) | 1.32 (0.98-1.79) |
| **Atrial fibrillation** | 2.52 (1.79-3.54) | 2.20 (1.53-3.17) | 1.36 (0.70-2.63) |
| **Liver disease** | 1.26 (0.63-2.55) | 1.28 (0.64-2.58) | 1.10 (0.54-2.24) |
| **Diabetes** | 1.23 (0.95-1.61) | 1.12 (0.85-1.47) | 1.31 (0.81-2.13) |
| **Hypertension** | 1.10 (0.89-1.36) | 0.95 (0.75-1.19) | 0.98 (0.72-1.34) |
| **Obesity** | 0.95 (0.74-1.20) | 0.92 (0.72-1.17) | 0.83 (0.64-1.08) |
| **Smoking** | 0.53 (0.37-0.76) | 0.56 (0.39-0.81) | 0.51 (0.35-0.74) |
| **Alcoholism** | 1.03 (0.51-2.07) | 1.03 (0.51-2.09) | 1.10 (0.53-2.24) |
| **Chronic medications use** | | | |
| **Diuretics** | 2.22 (1.71-2.89) | 2.07 (1.56-2.74) | 1.54 (1.11-2.13) |
| **Beta blockers** | 1.49 (1.12-1.97) | 1.36 (1.02-1.81) | 1.03 (0.74-1.43) |
| **ACEIs** | 0.75 (0.56-0.99) | 0.67 (0.50-0.89) | 0.63 (0.45-0.89) |
| **ARBs** | 1.10 (0.80-1.52) | 0.99 (0.71-1.37) | 0.77 (0.52-1.13) |
| **Calcium channel blockers** | 1.28 (0.90-1.81) | 1.14 (0.80-1.63) | 1.07 (0.73-1.56) |
| **Statins** | 0.92 (0.70-1.20) | 0.82 (0.62-1.08) | 0.66 (0.49-0.90) |
| **Oral anticoagulants** | 2.39 (1.70-3.36) | 2.10 (1.46-3.00) | 1.33 (0.68-2.60) |
| **Antiplatelet drugs** | 1.49 (1.11-1.98) | 1.31 (0.97-1.77) | 1.35 (0.94-1.96) |
| **Insulin** | 1.93 (1.28-2.93) | 1.77 (1.17-2.69) | 1.42 (0.85-2.37) |
| **Oral antidiabetic drugs** | 0.98 (0.71-1.34) | 0.88 (0.64-1.21) | 0.66 (0.40-1.09) |
| **Inhaled respiratory drugs** | 2.34 (1.76-3.11) | 2.18 (1.63-2.92) | 1.49 (0.93-2.37) |
| **Antineoplastic agents** | 0.85 (0.38-1.91) | 0.85 (0.38-1.90) | 0.52 (0.22-1.23) |
| **Systemic corticosteroids** | 1.90 (1.01-3.57) | 1.76 (0.94-3.31) | 1.21 (0.61-2.38) |
| **NSADIs** | 1.11 (0.71-1.72) | 1.16 (0.75-1.81) | 1.20 (0.76-1.88) |
| **Antihistamines** | 0.90 (0.52-1.57) | 0.91 (0.52-1.59) | 0.73 (0.42-1.29) |
| **Proton-Pump Inhibitors** | 1.60 (1.27-2.00) | 1.47 (1.16-1.87) | 1.15 (0.86-1.52) |
| **Benzodiazepines** | 1.41 (1.09-1.82) | 1.36 (1.04-1.78) | 1.28 (0.97-1.68) |
| **Vaccination’s history** | | | |
| **Flu vaccine in prior autumn** | 1.11 (0.88-1.40) | 0.92 (0.71-1.19) | 0.68 (0.51-0.92) |
| **PPV23** | 1.46 (1.18-1.81) | 1.29 (0.97-1.70) | 1.33 (0.95-1.88) |
| **PCV13** | 2.71 (1.56-4.72) | 2.48 (1.42-4.33) | 1.65 (0.92-2.98) |
| **Tetanus** | 1.13 (0.91-1.42) | 1.05 (0.83-1.32) | 0.99 (0.77-1.28) |

NOTE: HRs denotes Hazard ratios, and were calculated for those who had the condition as compared with those who had not the condition. In multivariable-adjusted analysis the HRs were adjusted for age (continuous years), sex, comorbidities/underlying conditions and chronic medications use. CIs denote confidence intervals.

**Supplementary Table S3. Univariate and multivariate analyses assessing susceptibility/risk to suffer laboratory-confirmed Covid-19 among nursing-home residents (N=1,414). Tarragona region (Southern Catalonia, Spain), from 01/03/2020 to 30/06/2020.**

| **CHARACTERISTIC** | **Study population**  **(N=1414)**  **n (%)** | **LABORATORY-CONFIRMED COVID-19 CASES (n=191)** | |
| --- | --- | --- | --- |
| **Univariate analysis**  **n (%) p value** | **Multivariable analysis**  **HR (95% CI)** |
| **Socio-demographic** | | | |
| **Age:** 50-64 years  65-79 years  ≥80 years | 151 (10.7)  301 (21.3)  962 (68.0) | 2 (1.0) <0.001  29 (15.2)  160 (83.8) | Age, continuous yrs:  1.03 (1.01-1.05) |
| **Sex:** Men  Women | 483 (34.2)  931 (65.8) | 63 (33.9) 0.713  128 (66.1) | 1.00 (reference)  0.78 (0.56-1.09) |
| **Comorbidities** | | | |
| **Neurological disease** | 367 (26.0) | 65 (34.0) 0.006 | 1.28 (0.93-1.75) |
| **Renal disease** | 236 (16.7) | 25 (13.1) 0.151 | 0.69 (0.44-1.08) |
| **Cancer** | 169 (12.0) | 21 (11.0) 0.661 | 0.83 (0.51-1.35) |
| **Rheumatic disease** | 12 (0.8) | 1 (0.5) 0.598 | 0.73 (0.10-5.42) |
| **Respiratory disease** | 198 (14.0) | 19 (9.9) 0.082 | 0.75 (0.43-1.32) |
| **Cardiac disease** | 512 (36.2) | 63 (33.0) 0.319 | 0.80 (0.57-1.12) |
| **Atrial fibrillation** | 226 (16.0) | 33 (17.3) 0.600 | 1.23 (0.72-2.08) |
| **Liver disease** | 27 (1.9) | 3 (16) 0.713 | 0.83 (0.26-2.63) |
| **Diabetes** | 392 (27.7) | 58 (30.4) 0.380 | 1.02 (0.61-1.68) |
| **Hypertension** | 953 (67.4) | 131 (68.6) 0.706 | 0.98 (0.68-1.41) |
| **Obesity** | 335 (23.7) | 44 (23.0) 0.819 | 1.13 (0.79-1.61) |
| **Smoking** | 110 (7.8) | 9 (4.7) 0.089 | 0.98 (0.47-2.02) |
| **Alcoholism** | 40 (2.8) | 3 (1.6) 0.259 | 0.59 (0.18-1.92) |
| **Chronic medication use** | | | |
| **Diuretics** | 453 (32.0) | 69 (36.1) 0.193 | 1.26 (0.91-1.75) |
| **Beta blockers** | 260 (18.4) | 29 (15.2) 0.219 | 0.77 (0.50-1.19) |
| **ACEIs** | 389 (27.5) | 58 (30.4) 0.342 | 0.97 (0.68-1.38) |
| **ARBs** | 160 (11.3) | 12 (6.3) 0.018 | 0.47 (0.25-0.87) |
| **Calcium channel blockers** | 175 (12.4) | 29 (15.2) 0.205 | 1.37 (0.89-2.10) |
| **Statins** | 224 (15.8) | 25 (13.1) 0.263 | 0.92 (0.58-1.48) |
| **Oral anticoagulants** | 171 (12.1) | 21 (11.0) 0.617 | 0.87 (0.46-1.65) |
| **Antiplatelet drugs** | 345 (24.4) | 53 (27.7) 0.246 | 1.35 (0.92-1.99) |
| **Insulin** | 138 (9.8) | 19 (9.9) 0.925 | 0.82 (0.47-1.43) |
| **Oral antidiabetic drugs** | 233 (16.5) | 40 (20.9) 0.074 | 1.79 (1.04-3.08) |
| **Inhaled respiratory drugs** | 198 (14.0) | 20 (10.5) 0.130 | 0.81 (0.47-1.40) |
| **Antineoplastic agents** | 33 (2.3) | 6 (3.1) 0.427 | 2.51 (1.05-6.01) |
| **Systemic corticosteroids** | 36 (2.5) | 0 (0.0) 0.016 | 0.00 (-) |
| **NSAIDs** | 16 (1.1) | 0 (0.0) 0.112 | 0.00 (-) |
| **Antihistamines** | 43 (3.0) | 2 (1.0) 0.084 | 0.40 (0.10-1.63) |
| **Proton-Pump Inhibitors** | 616 (43.6) | 75 (39.3) 0.198 | 0.74 (0.53-1.04) |
| **Benzodiazepines** | 392 (27.7) | 52 (27.2) 0.869 | 0.97 (0.70-1.36) |
| **Vaccination’s history** | | | |
| **Flu vaccine in prior autumn** | 1037 (73.3) | 155 (81.2) 0.009 | 1.56 (1.07-2.29) |
| **PPV23** | 961 (68.0) | 130 (68.1) 0.975 | 0.95 (0.65-1.39) |
| **PCV13** | 24 (1.7) | 5 (2.6) 0.290 | 1.89 (0.73-4.88) |
| **Tetanus** | 982 (69.4) | 113 (59.2) 0.001 | 0.63 (0.44-0.91) |

NOTE: P-values in univariate analysis were calculated by chi-squared, or Fisher’s test as appropriate, comparing percentages in the study population *vs* COVID-19 cases; HRs denotes Hazard ratios, and were calculated for those who had the condition as compared with those who had not the condition, and were adjusted for age (continuous years), sex, comorbidities/underlying conditions and chronic medications use. CIs denote confidence intervals.
